# Supplementary material
Source: PubMed Central journal article supplement (PMC6585168)
Supplement: Supp_Table1.pdf [file Supp_Table1.pdf]

## Supplementary Data

SUPPLEMENTARY TABLE S1. DESCRIPTIVE STATISTICS AND BIVARIATE CORRELATIONS  
BETWEEN STUDY VARIABLES IN THE OVERALL SAMPLE

|                                       | 2     | 3     | 4                 | 5                 | 6                  | 7                  | M (SD)       | Range       |
|---------------------------------------|-------|-------|-------------------|-------------------|--------------------|--------------------|--------------|-------------|
| 1. Age                                | -0.20 | -0.09 | 0.35 <sup>a</sup> | 0.16              | -0.64 <sup>b</sup> | 0.02               | 13.07 (4.05) | 7.00–19.00  |
| 2. Pre-treatment anxiety severity     | –     | 0.22  | 0.05              | 0.12              | 0.07               | -0.10              | 25.00 (3.91) | 19.00–32.00 |
| 3. Post-treatment anxiety severity    |       | –     | 0.23              | 0.44 <sup>b</sup> | -0.23              | -0.40 <sup>b</sup> | 11.37 (6.06) | 0.00–24.00  |
| 4. Pre-treatment depressive symptoms  |       |       | –                 | 0.79 <sup>b</sup> | -0.48 <sup>b</sup> | -0.42 <sup>b</sup> | 13.33 (7.15) | 2.00–30.00  |
| 5. Post-treatment depressive symptoms |       |       |                   | –                 | -0.14              | -0.27              | 7.96 (6.15)  | 0.00–23.00  |
| 6. RewP to rewards                    |       |       |                   |                   | –                  | 0.15               | 10.50 (7.40) | -2.20–28.09 |
| 7. RewP to breaking even              |       |       |                   |                   |                    | –                  | 4.36 (5.19)  | -7.44–14.37 |

<sup>a</sup> $p=0.07$ .

<sup>b</sup> $p<0.05$ .

RewP, reward positivity.
